# Supplementary material for: Computational investigation of a switchable emulsion stabilized by the mixture of a surfactant and tertiary amine
Source: Royal Society of Chemistry journal article supplement (doi:10.1039/d0cp05686c), 2020-11-17
Supplement: d0cp05686c1.pdf [file d0cp05686c1.pdf]

Supplementary Information for

# Computational Investigation of a Switchable Emulsion Stabilized by the Mixture of Surfactant and Tertiary Amine

Yue Wang,<sup>a</sup> Hui Yan<sup>\*,a</sup>, Xiujuan Zhong<sup>a</sup> and Shiling Yuan<sup>\*,b</sup>

<sup>a</sup> School of Pharmacy, Liaocheng University, Liaocheng 252059, China

<sup>b</sup> Key Lab of Colloid and Interface Chemistry, Shandong University, Jinan 250199, China

\*E-mail: yanhui@lcu.edu.cn (H.Y.); shilingyuan@sdu.edu.cn (S.Y.).

## Table of Contents

|                                                                                                   |    |
|---------------------------------------------------------------------------------------------------|----|
| <b>Table S1.</b> Summary of the Simulated Systems .....                                           | 2  |
| <b>Fig. S1</b> Results for the repeated systems .....                                             | 3  |
| <b>Fig. S2</b> Results for the systems with different ratios of surfactat and oil. ....           | 4  |
| <b>Fig. S3</b> Simulated results of another system II .....                                       | 5  |
| <b>Fig. S4</b> Time variation of the simulation box in each system. ....                          | 6  |
| <b>Fig. S5</b> Simulated results of system V .....                                                | 7  |
| <b>Fig. S6</b> Detailed structure of the droplet.....                                             | 8  |
| <b>Fig. S7</b> Droplets' coalescence. ....                                                        | 9  |
| <b>Fig. S8</b> Configurations of HCO <sub>3</sub> <sup>-</sup> during droplets' coalescence. .... | 10 |
| <b>Fig. S9</b> Results for the systems with different percentages of PMA <sup>2+</sup> ..         | 11 |
| <b>Fig. S10</b> An illustration of the pulling simulation .....                                   | 12 |
| <b>Fig. S11</b> Configurations corresponding to the maximum of the PMF curves. ....               | 13 |
| <b>Fig. S12</b> RDFs of water around OA <sup>-</sup> headgroup or PMA <sup>2+</sup> .....         | 14 |

**Table S1.** Summary of the Simulated Systems

| system | oil | OA <sup>-</sup> | Na <sup>+</sup> | PMA | PMA <sup>2+</sup> | HCO <sub>3</sub> <sup>-</sup> | water | simulation<br>time / ns | length of cubic<br>box / nm |
|--------|-----|-----------------|-----------------|-----|-------------------|-------------------------------|-------|-------------------------|-----------------------------|
| I      | 300 | 100             | 100             |     |                   |                               | 27243 | 100                     | 9.936                       |
| II     | 300 | 100             | 100             | 100 |                   |                               | 26069 | 100                     | 9.929                       |
| III    | 300 | 100             | 100             |     | 100               | 200                           | 25418 | 50                      | 9.888                       |
| IV     | 300 | 100             | 100             |     | 100               | 200                           | 25028 | 20                      | 9.840                       |
| V      | 300 | 100             | 100             |     | 100               | 200                           | 25038 | 20                      | 9.846                       |

A flowchart showing the relationship of the above systems:

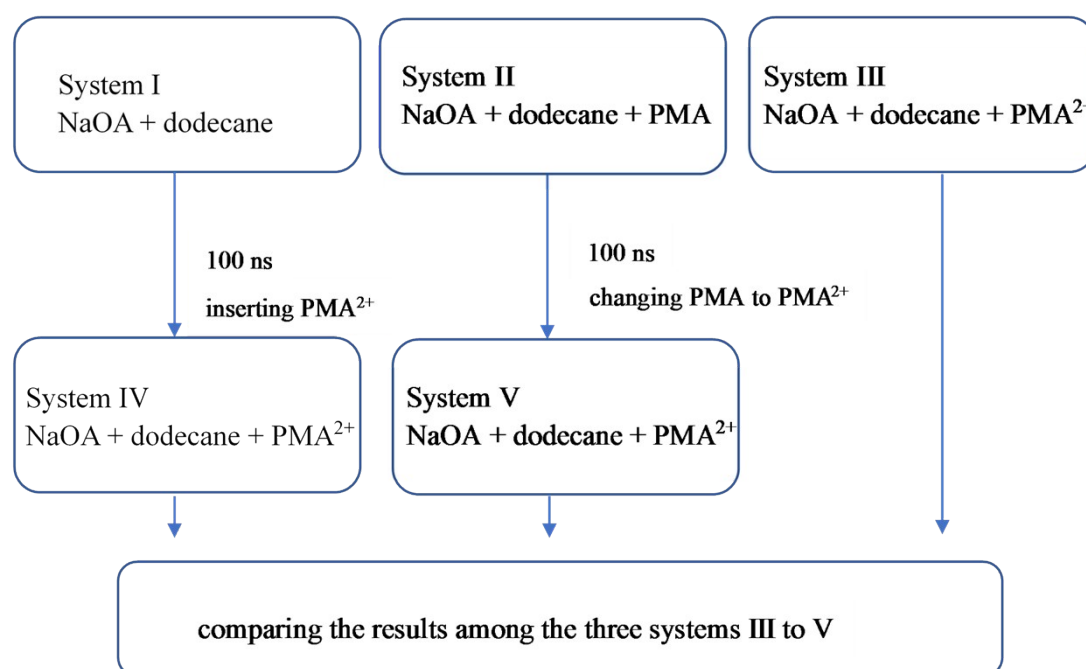

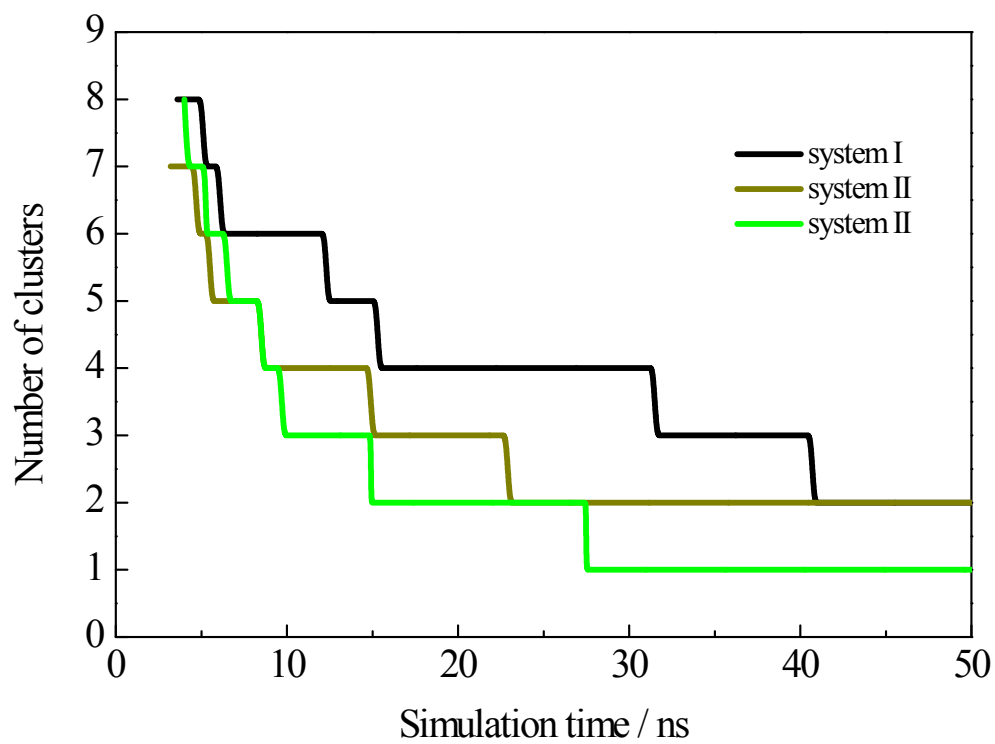

**Fig. S1** Number of aggregated clusters with time evolution for the repeated systems.

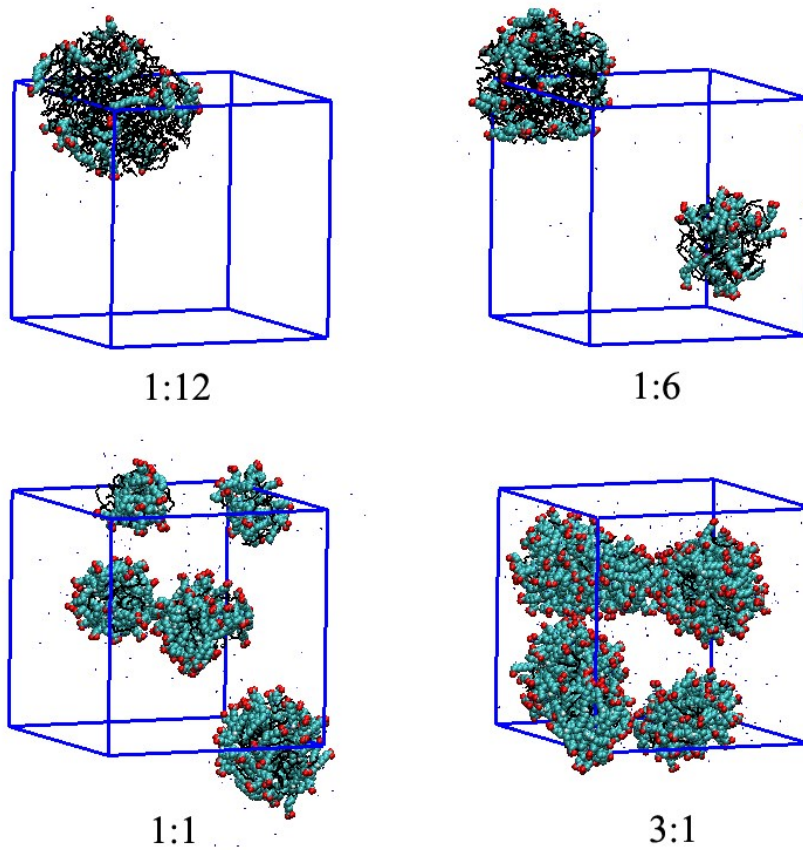

**Fig. S2** Final configurations of the simulated systems with different surfactant-hexadecane proportion. The numbers of OA-: dodecane for these three systems are, in turn, 25:300, 50:300, 150:150, and 300:100.

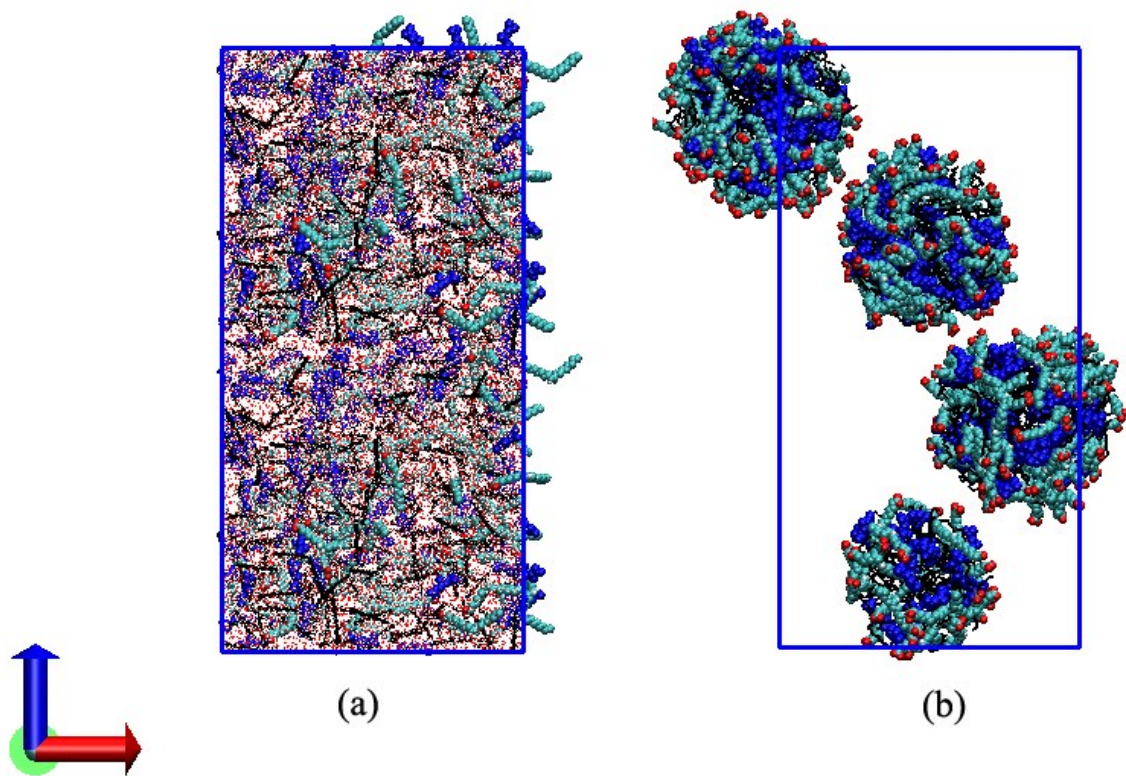

**Fig. S3** Simulated results of system II whose dimension was doubled along z direction.

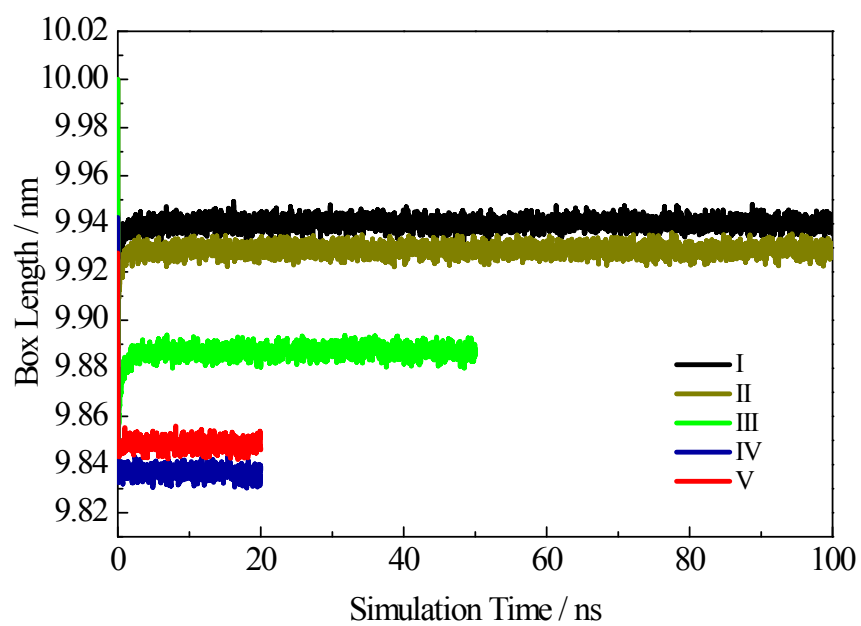

**Fig. S4** Time variation of the simulation box in each system.

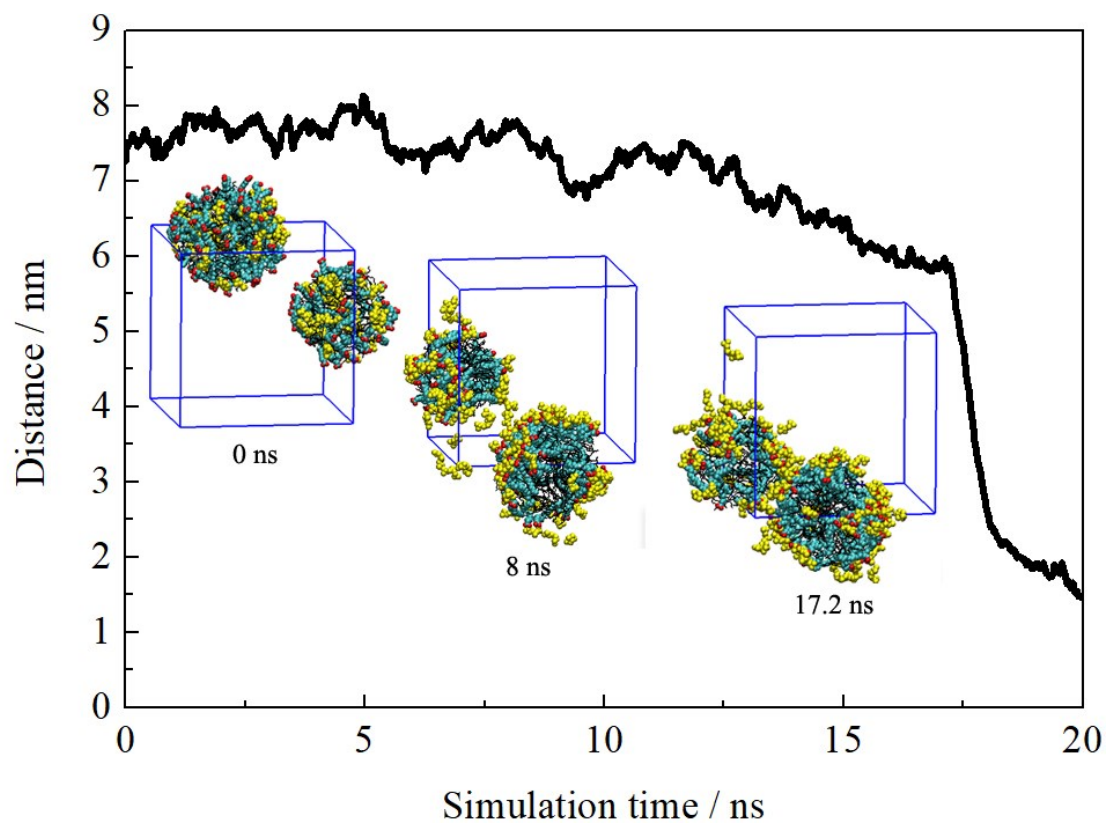

**Fig. S5** Simulated results of system V.

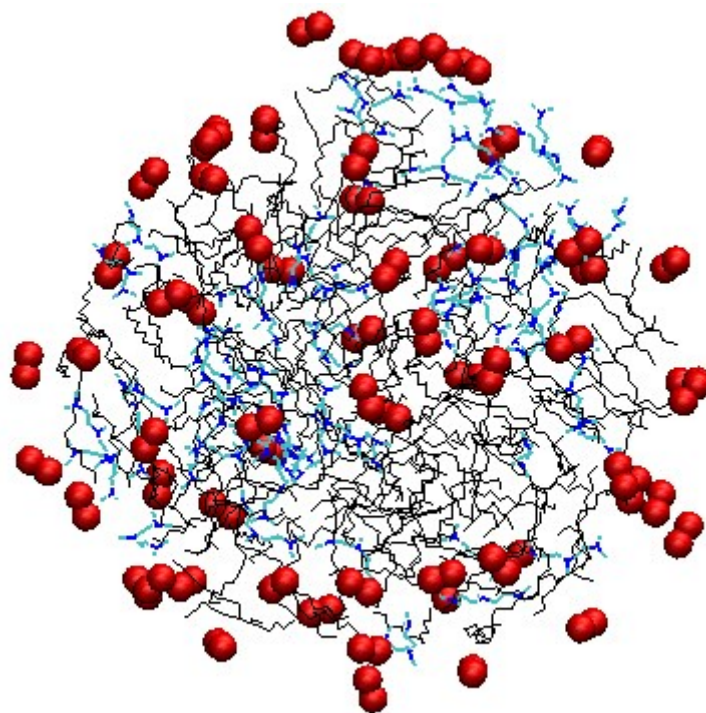

**Fig. S6** Structure of the droplet formed by OA<sup>-</sup>, PMA and dodecane molecules (derived from system III). The headgroup O atoms of OA<sup>-</sup> are highlighted to give a clear view, and PMA molecules are shown by blue lines.



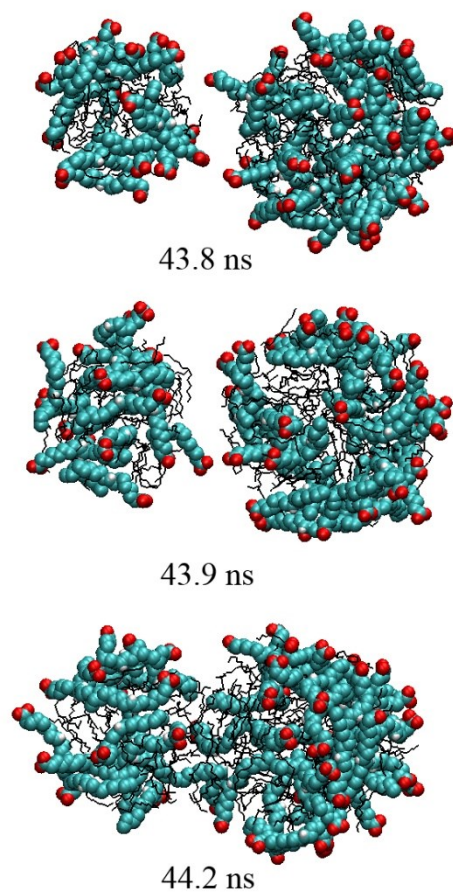

**Fig. S7** Instantaneous configurations derived from MD trajectories of system I to show the dynamical process of the droplets' coalescence.

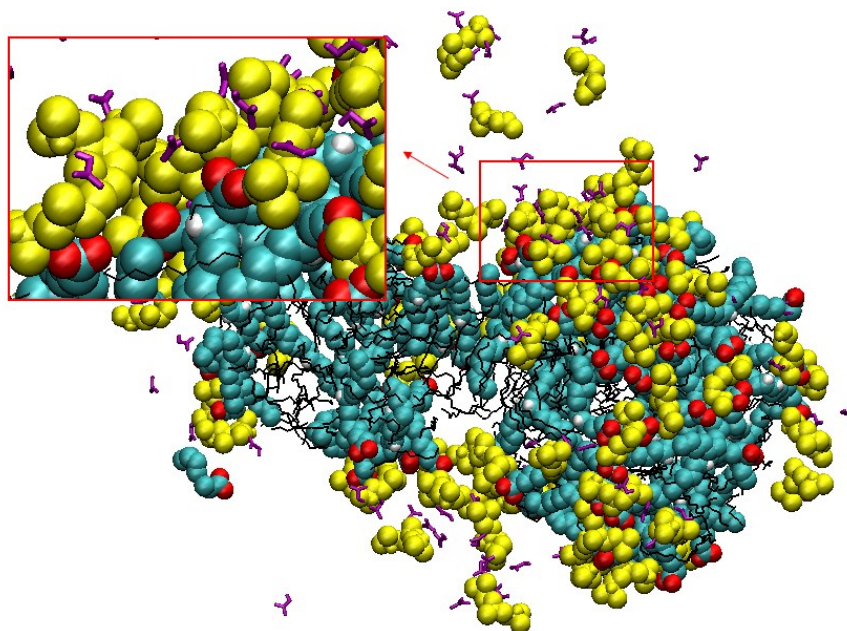

**Fig. S8** Configurations of  $\text{HCO}_3^-$  in the dynamical process of droplets' coalescence (at 6.6 ns shown in Fig. 7).

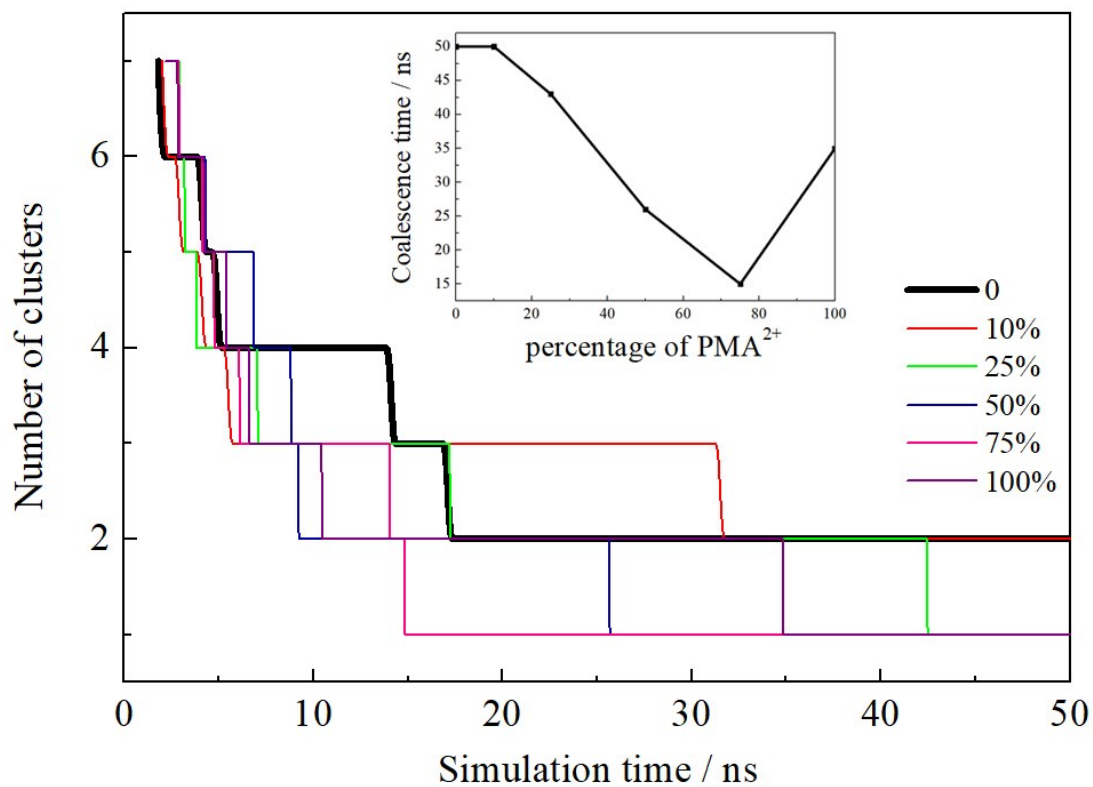

**Fig. S9** Number of aggregated clusters with time evolution for the systems with different percentages of PMA<sup>2+</sup>. The inset profile shows the simulation time of one droplet formed plotted against the percentage of PMA<sup>2+</sup>.

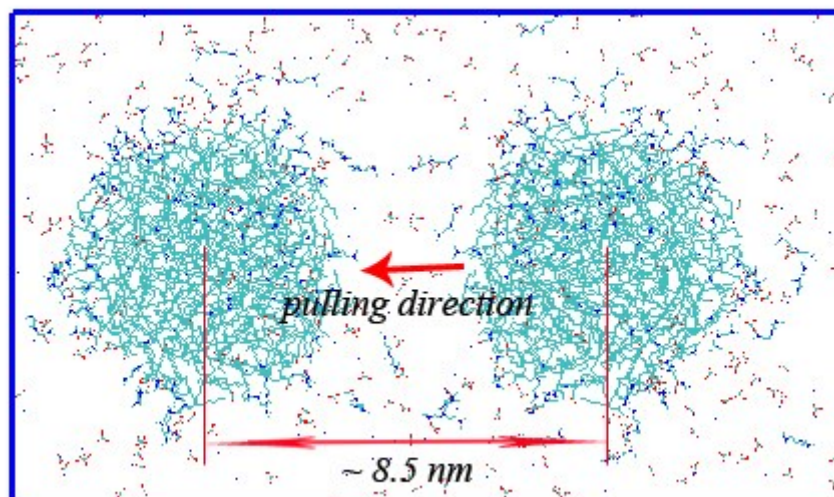

**Fig. S10** An illustration of the initial setup for the pulling simulation of the two droplets' coalescence. The solid blue rectangle represents the periodic boundaries.

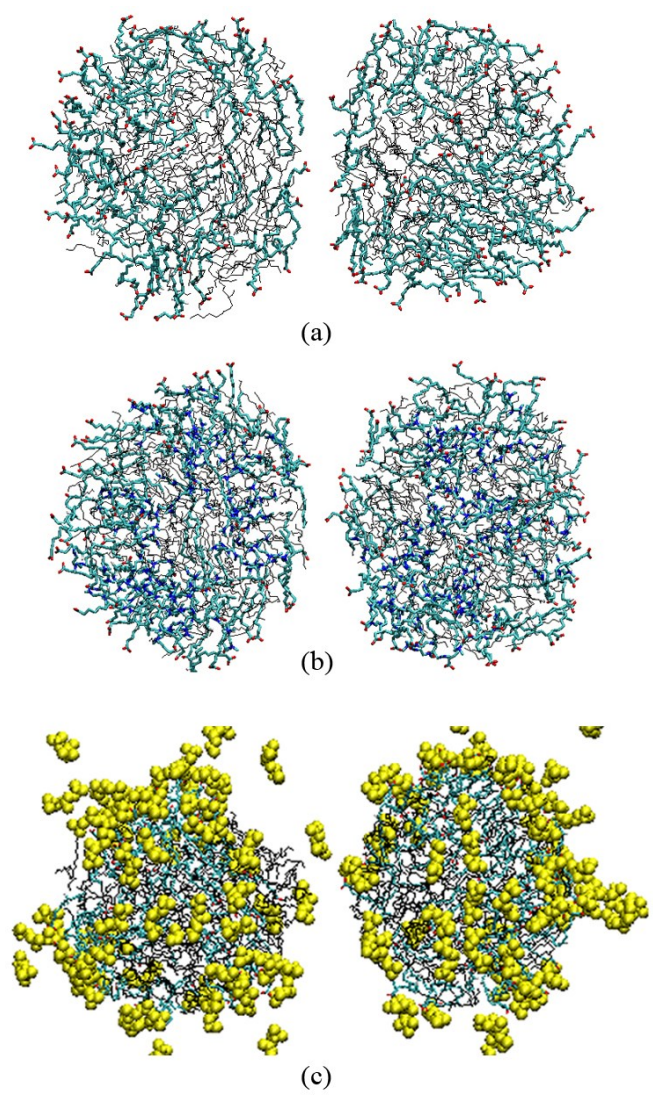

**Fig. S11** Configurations corresponding to the maximum of the PMF curves.

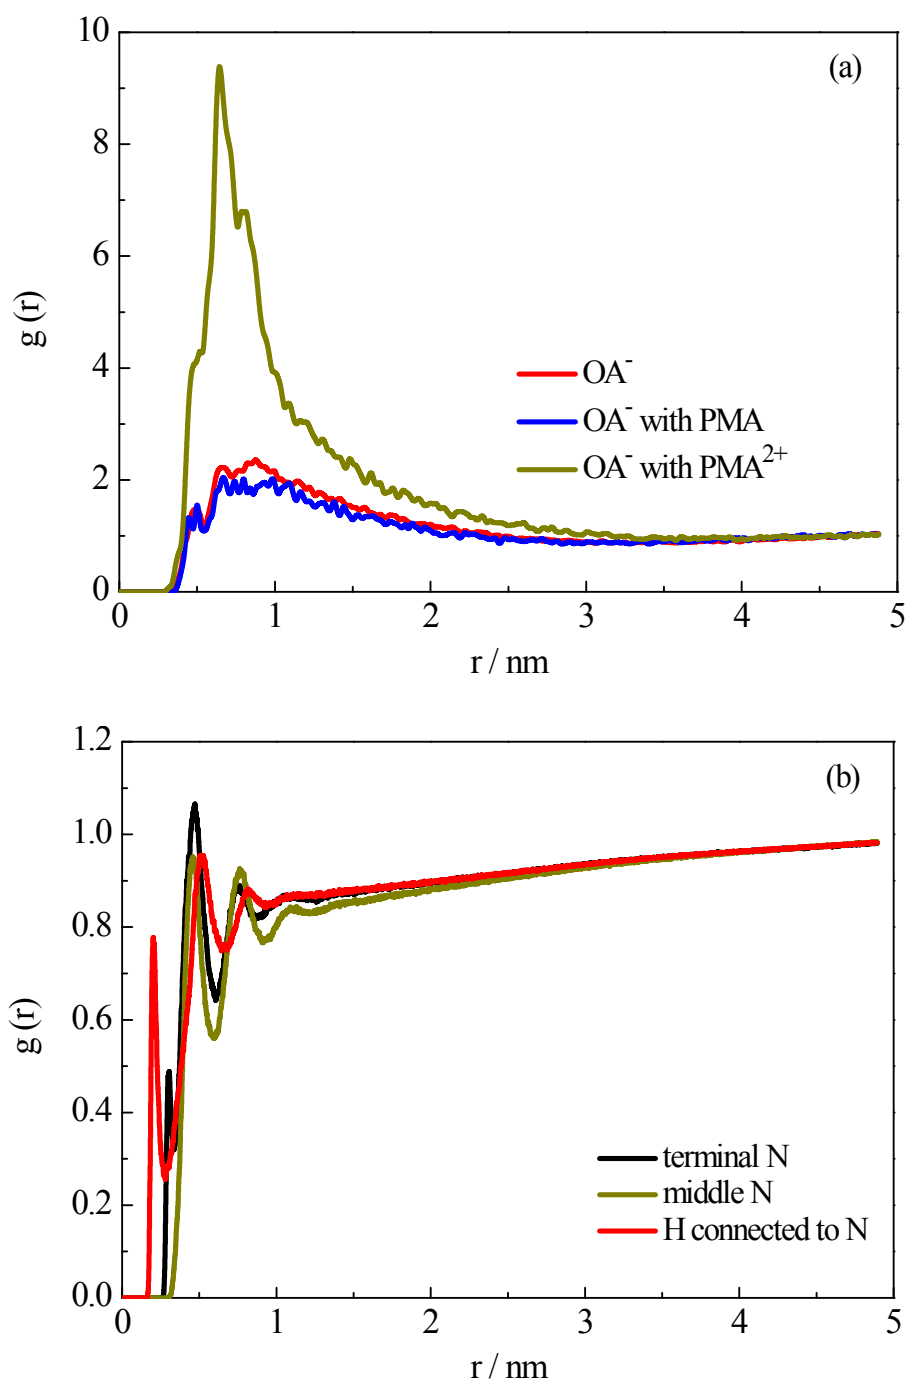

**Fig. S12** (a) RDFs between headgroup oxygen atoms of surfactant  $\text{OA}^-$ . (b) RDFs of water molecules around the selected atoms in  $\text{PMA}^{2+}$ .
